# Development of dim-light vision in the nocturnal reef fish family Holocentridae I: Retinal gene expression

Lily G. Fogg<sup>1,\*</sup>, Fabio Cortesi<sup>1</sup>, David Lecchini<sup>2,3</sup>, Camille Gache<sup>2,3</sup>, N. Justin Marshall<sup>1</sup>,

Fanny de Busserolles<sup>1</sup>

<sup>1</sup>Queensland Brain Institute, The University of Queensland, Brisbane, Queensland, 4072, Australia

<sup>2</sup>PSL Research University, EPHE-UPVD-CNRS, UAR3278 CRIOBE, 98729 Papetoai, Moorea, French Polynesia

<sup>3</sup>Laboratoire d'Excellence "CORAIL", Paris, France

\*Corresponding author: lily.fogg@uqconnect.edu.au

**Key words:** Ontogeny, Multibank retina, Teleost fish, Opsins, Transcriptomics

## Summary statement

Coral reef fishes in the family Holocentridae remodel their retina at the molecular level to adapt to a nocturnal lifestyle during development.

## Abstract

Developmental changes to the visual systems of animals are often associated with ecological shifts. Reef fishes experience a change in habitat between larval life in the shallow open ocean to juvenile and adult life on the reef. Some species also change their lifestyle over this period and become nocturnal. While these ecological transitions are well documented, little is known about the ontogeny of nocturnal reef fish vision. Here, we used transcriptomics to investigate visual development in 12 representative species from both subfamilies,

Holocentrinae (squirrelfishes) and Myripristinae (soldierfishes), in the nocturnal coral reef fish family, Holocentridae. Results revealed that the visual systems of holocentrids are initially well-adapted to photopic conditions with pre-settlement larvae having high cone opsin gene expression and a broad cone opsin gene repertoire (8 genes). At reef settlement, holocentrids started to invest more in their scotopic visual system and compared to adults, showed upregulation of genes involved in cell differentiation/proliferation. By adulthood, they had well-developed scotopic vision with high rod opsin gene expression, reduced cone opsin gene expression and repertoire (1-4 genes) and upregulated phototransduction genes. Finally, although the two subfamilies shared similar ecologies across development, their visual systems diverged after settlement, with Myripristinae investing more in scotopic vision than Holocentrinae. Hence, both ecology and phylogeny likely determine the development of the holocentrid visual system.

## Introduction

Vision underlies many behaviours crucial to survival, most notably foraging, mating and predator avoidance (Cronin *et al.* 2014). As a result of their varied ecologies and the different light environments that they inhabit, marine fishes possess exceptionally diverse visual adaptations. These adaptations are reflected at the molecular level in the class, copy number and level of expression of the genes in their retina (de Busserolles *et al.* 2020; Cortesi *et al.* 2020). The retina has two main types of light-sensing cells: rods and cones (Lamb 2013). Rods usually contain the visual pigment, rhodopsin (RH1, rhodopsin-like middle-wavelength sensitive 1), and mediate scotopic (dim light) vision. Cones mediate photopic (bright light) and colour vision and are divided into single and double cones (*i.e.*, two fused single cones). Single cones usually have SWS1 (short-wavelength sensitive 1) and SWS2 opsins, while double cones usually have RH2 (rhodopsin-like middle-wavelength sensitive 2) and LWS (long-wavelength sensitive) opsins [(Bowmaker 2008; Carleton *et al.* 2008; Dalton *et al.* 2017); reviewed in (Carleton *et al.* 2020)]. Each opsin class has a different range of spectral sensitivities, including UV-violet (SWS1), violet-blue (SWS2), blue-green (RH2 and RH1) and green-red (LWS), that can be tuned to match the environmental light conditions [(Lythgoe 1979; Cronin *et al.* 2014; Schweikert *et al.* 2018); reviewed in (Carleton *et al.* 2020; Musilova *et al.* 2021)].

Interspecific differences in many retinal genes, particularly changes in the expression of the opsin genes and their spectral sensitivities, correlate well with ecological demands (Shand 1997; Stieb *et al.* 2016; Luehrmann *et al.* 2020). For instance, fishes living in dim environments (*e.g.*, deep-sea habitat or nocturnal lifestyle) have evolved a shared array of molecular adaptations to enhance the sensitivity of their eyes. These include high *rh1* gene expression and low cone opsin gene expression (Luehrmann *et al.* 2019; de Busserolles *et al.* 2021; Lupše *et al.* 2021), and spectral tuning of their *rh1* gene to wavelengths that predominate in their depth range (Toller 1996; Douglas *et al.* 2003). Furthermore, several species show more extreme scotopic adaptations, such as exclusive expression of rod-specific genes (Lupše *et al.* 2021) and duplication of their *rh1* gene (Musilova *et al.* 2019). Despite the fact that many of these adaptations are relatively widespread, little is known about their development.

During development, most marine fishes undergo significant shifts in ecology. Larval marine fishes typically inhabit the (zoo)plankton-rich upper layers of the epipelagic ocean (Job and Bellwood 2000; Helfman *et al.* 2009), where the available light is bright and broad-spectrum ranging from UV (<400 nm) to red (>600 nm) (Boehlert 1996). However, as juveniles and adults, different species may transition to very different habitats (pelagic, estuarine, reef, deep-sea) and adopt contrasting diets (planktivory, carnivory, herbivory, corallivory), and diel activity patterns (diurnal, nocturnal, crepuscular) (King and McFarlane 2003; Helfman *et al.* 2009). These changes in light environment and ecological demands are thought to be the main drivers of visual system development in marine fishes (Carleton *et al.* 2020; Musilova *et al.* 2021). Accordingly, molecular changes in their visual systems have previously been correlated with ontogenetic changes in diet [surgeonfishes (Tettamanti *et al.* 2019)], depth [numerous deep-sea species (Lupše *et al.* 2021)], habitat [clown anemonefish (Roux *et al.* 2022)], and colouration [dottybacks (Cortesi *et al.* 2016)].

In marine fishes that adopt bright environments, visual development is characterised by typical changes to the retina at the molecular level. In general, the retina is dominated by cone opsin gene expression at early larval stages, while the onset of *rh1* expression is initially delayed but subsequently increases to become the dominantly expressed opsin gene in the post-metamorphic retina (Helvik *et al.* 2001; Mader and Cameron 2004; Tettamanti *et al.* 2019; Wang *et al.* 2021; Frau *et al.* 2022). This overall shift is accompanied by more species-specific modifications, such as increased expression of cone opsin genes that are sensitive to ecologically relevant wavelengths (Shand *et al.* 2008; Cortesi *et al.* 2016; Savelli *et al.* 2018;

Tettamanti *et al.* 2019). Contrastingly, in fishes which adopt dim environments, visual development seems to be characterised by a more rapid and extreme version of these changes. For example, some deep-sea fishes seem to express cone opsin genes as larvae but progress to expressing only rod opsin genes in adulthood (Bozzano *et al.* 2007; de Busserolles *et al.* 2014; Lupše *et al.* 2021). However, most of the previous studies on visual development in dim environments focused on deep-sea fishes (Cortesi *et al.* 2020). Conversely, very little is known about how the visual system develops in nocturnal reef fishes [but see (Job and Shand 2001)].

Here, we investigated visual development at the molecular level in the nocturnal reef fish family, Holocentridae. Larvae from both subfamilies, Holocentrinae (squirrelfishes) and Myripristinae (soldierfishes), inhabit the upper pelagic ocean where they feed on zooplankton (Tyler *et al.* 1993; Sampey *et al.* 2007). Around metamorphosis, most holocentrids (except for a few species that migrate to deeper waters) migrate to a shallow tropical coral reef habitat (Nelson 1994) and adopt a nocturnal lifestyle feeding on benthic crustaceans (Holocentrinae) or zooplankton in the water column (Myripristinae) (Gladfelter and Johnson 1983; Greenfield 2002; Greenfield *et al.* 2017). We recently characterised the visual systems of adult holocentrids (de Busserolles *et al.* 2021). We demonstrated that they show high investment in scotopic vision, with *rh1*-dominated opsin gene expression. Notably, their rod spectral sensitivities have been shown to be tuned to their preferred depth, *i.e.*, blue-shifted when living deeper compared to red-shifted in the shallows (Toller 1996; Yokoyama and Takenaka 2004). Finally, adults also have some degree of photopic vision, more so in Holocentrinae than Myripristinae, with the presence of single cones expressing *sws2*, and double cones expressing 1-2 *rh2s* (de Busserolles *et al.* 2021).

Although the visual systems of adult holocentrids have been well-characterised, little is known about how they develop. Thus, we used high-throughput RNA sequencing to examine opsin gene expression and whole-transcriptome differential gene expression in the retina at key ontogenetic stages (pre-settlement larvae, settlement larvae, settled juveniles and adults). We studied shallow reef-dwelling species from three genera (*Sargocentron*, *Neoniphon* and *Myripristis*) spanning both holocentrid subfamilies, as well as an adult for a deeper-dwelling species (*Ostichthys* sp.). Using this approach, we aimed to assess how the holocentrid visual system changes on a molecular level as they shift from a bright to a dim environment.

## Materials and methods

### *Animal collection and retinal tissue preservation*

Details of all animals used in this study are given in Table S1. Pre-settlement larvae, which are pelagic larvae close to transitioning to the reef, were collected on the Great Barrier Reef around Lizard Island, Australia (14°40'S, 145°27'E) using light traps in February 2020. Settlement larvae, larvae that have just transitioned to the reef, were collected using a crest net positioned on the reef crest of the lagoon at Temae, Moorea, French Polynesia (17°29'S, 149°45'W) in February and March 2019 (Lecchini *et al.* 2004; Besson *et al.* 2017). Settled juveniles were larvae caught in light traps on Lizard Island which were allowed to metamorphose and further develop for two weeks in outdoor aquaria exposed to natural light in March 2017. Adults were collected with either spearguns or pole and lines on the reefs surrounding Moorea in March 2018 and 2019 or collected with clove oil and hand nets at Lizard Island in February 2020. Some adults were also sourced from a supplier, Cairns Marine (Cairns Marine Pty Ltd, Cairns, Australia; <https://www.cairnsmarine.com/>), that collects from the northern Great Barrier Reef.

Fish collection and euthanasia followed procedures approved by the University of Queensland Animal Ethics Committee (QBI 304/16). Briefly, fish were first anaesthetised by immersion in a solution of 0.2 mL of clove oil per litre of seawater until respiration and all response to light and touch had ceased and were then euthanised by swift decapitation. All collections within Australia were conducted under a Great Barrier Reef Marine Park Permit (G17/38160.1) and Queensland General Fisheries Permit (180731) and all collections in French Polynesia were conducted in accordance with French regulations. Following euthanasia, all individuals were photographed with a ruler and their body size [total length (TL) and standard length (SL)] and eye diameter subsequently measured from photographs using Fiji v1.53c [National Institutes of Health, USA; (Schindelin *et al.* 2012)]. Eyes were immediately enucleated, the cornea and lens removed, and the eye cup preserved in RNAlater (Sigma-Aldrich).

### *Transcriptome sequencing, quality control and de novo assembly*

Retinal transcriptomes were sequenced for a total of 22 individuals in Holocentridae: two pre-settlement larvae (*S. rubrum*, *n*=2), seven settlement larvae (*S. punctatissimum*, *n*=4; *M. berndti*, *n*=1; *M. pralinia*, *n*=1; *M. kuntee*, *n*=1), six settled juveniles (*S. rubrum*, *n*=3; *S. cornutum*, *n*=1; *Neoniphon sammara*, *n*=2) and seven adults (*S. punctatissimum*, *n*=3; *S. rubrum*, *n*=2; *M. kuntee*, *n*=1; *Ostichthys* sp., *n*=1). The adult dataset was completed with previously published transcriptomic (*S. rubrum*, *n*=1; *S. spiniferum*, *n*=1; *S. diadema*, *n*=1; *N. sammara*, *n*=3; *M. berndti*, *n*=4; *M. jacobus*, *n*=2, *M. murdjan*, *n*=1) and genomic (*M. jacobus*, *n*=1) data (Malmstrøm *et al.* 2017; Musilova *et al.* 2019; de Busserolles *et al.* 2021), resulting in a total dataset of 35 retinal transcriptomes and one genome spanning 12 species.

Briefly, initial retinal tissue digestion was conducted using Proteinase K (20 mg/mL, 15-30 min digest at 55°C; New England Biolabs). Total RNA was extracted and isolated from the retinas using the Monarch Total RNA Miniprep Kit (New England Biolabs) and genomic DNA was removed using RNase-free DNase (Monarch). Quality and yield of isolated RNA was assessed using the Eukaryotic Total RNA 6000 Nano kit (Agilent technologies) and the Queensland Brain Institute's Bioanalyser 2100 (Agilent technologies). RNA extractions were shipped on dry ice and whole-retina transcriptome libraries were prepared from total RNA using the NEBNext Ultra RNA library preparation kit for Illumina (New England Biolabs) at Novogene's sequencing facilities in Beijing, Hong Kong, and Singapore. The concentration of each library was checked using a Qubit dsDNA BR Assay kit (ThermoFisher) prior to barcoding and pooling at equimolar ratios. Libraries were sequenced as 150 bp paired-end reads on a HiSeq 2500 using Illumina's SBS chemistry version 4. Libraries were trimmed and *de novo* assembled as described in de Busserolles *et al.* (2017). Briefly, read quality was assessed using FastQC (v0.72), raw reads were trimmed and filtered using Trimmomatic (v0.36.6) and transcriptomes were *de novo* assembled with Trinity (v2.8.4) using the genomics virtual laboratory on the Galaxy platform [usegalaxy.org; (Afgan *et al.* 2018)].

### *Opsin gene mining, phylogenetic reconstruction and expression analyses*

All cytochrome C oxidase subunit I (COI) and opsin gene extractions and expression analyses were conducted in Geneious Prime v2021.1.1 (Biomatters Ltd). Initially, COI genes were extracted from *de novo* assembled transcriptomes for species identification by mapping to species-specific references from Genbank (<https://www.ncbi.nlm.nih.gov/genbank/>) with

medium sensitivity settings. Opsin gene extractions were performed by mapping assembled transcriptomes to published opsin coding sequences (CDS) of the dusky dottyback (*Pseudochromis fuscus*) (Cortesi *et al.* 2016) with customised sensitivity settings (fine tuning, none; maximum gap per read, 15%; word length, 14; maximum mismatches per read, 40%; maximum gap size, 50 bp; index word length, 12; paired reads must both map). Contigs mapped to COI and opsin references were scored for similarity against publicly available sequences using BLASTn (NCBI, Bethesda, MD, <https://blast.ncbi.nlm.nih.gov/Blast.cgi>). One of the limitations of *de novo* assembly of highly similar genes (such as opsin gene paralogs) using short-read transcripts is that it can produce erroneous (chimeric) sequences or fail to reconstruct lowly expressed transcripts. Thus, a second approach was also employed using a manual extraction method from back-mapped reads to verify the initially extracted opsin genes, as per de Busserolles *et al.* (2017).

During manual gene extraction, filtered paired reads were mapped against *P. fuscus* reference opsin CDS (with previously stated customised sensitivity settings) in Geneious Prime. Matching reads were connected by following single nucleotide polymorphisms (SNPs) across genes with continual visual inspection for ambiguity and were extracted as paired mates to mitigate sequence gaps. The consensus of an assembly of these extracted reads was used as the reference for low sensitivity (high accuracy, 100% identity threshold) mapping. Partial CDS extractions were cyclically mapped using the low sensitivity approach to prolong and subsequently remap reads until a complete CDS was obtained.

To confirm the identity of each gene, full coding sequences were preliminarily checked on BLASTn and then used in conjunction with a reference dataset obtained from Genbank ([www.ncbi.nlm.nih.gov/genbank/](http://www.ncbi.nlm.nih.gov/genbank/)) and Ensembl ([www.ensembl.org/](http://www.ensembl.org/)) to reconstruct the opsin gene phylogeny (de Busserolles *et al.* 2017; de Busserolles *et al.* 2021). All opsin gene sequences were aligned using the MUSCLE plugin v3.8.425 (Edgar 2004) in Geneious Prime. MrBayes v3.2.6 (Ronquist *et al.* 2012) on CIPRES (Miller *et al.* 2010) was used to reconstruct a phylogenetic tree from the aligned sequences using the following parameters: GTR+I+G model, two independent MCMC searches with four chains each, 10 million generations per run, 1000 generations sample frequency, and 25% burn-in. The generated tree was edited in Figtree v1.4.4 (Rambaut and Drummond 2012).



For differential expression analyses, opsin gene paralogs were first scored on similarity using pairwise/multiple alignments. The similarity score minus one was used as the gene-specific maximum % mismatch threshold for mapping (paired) transcripts back onto complete extracted opsin CDS to ensure that reads did not map to multiple paralogs. The proportional expression of rod vs. cone opsin genes was calculated as the number of reads mapped to either *rh1* or all cone genes divided by the number of reads mapped to all genes, adjusted to account for differing gene lengths. The proportional expression of single vs. double cone opsin genes was calculated as the number of reads mapped to each single (*i.e.*, *sws1* and *sws2*) or double (*i.e.*, *rh2* and *lws*) cone opsin gene copy divided by the number of reads mapped to all single or double cone opsin genes, respectively, and adjusted for gene length.

#### *Whole-transcriptome differential gene expression analyses*

Further analyses were conducted to search for differentially expressed genes (DEGs) over development across the whole retinal transcriptome for *S. punctatissimum* (settlement larvae,  $n=3$ ; adults,  $n=3$ ). To control for diel fluctuations in visual gene expression, all individuals were euthanised at 8:30 am (Yourick *et al.* 2019). All analyses were conducted using the genomics virtual laboratory on the Galaxy platform. Firstly, the quality of the sequencing reads was assessed using FastQC (v0.72) and raw reads were subsequently trimmed and filtered using Trimmomatic (v0.36.6) as described previously. Given that a high-quality reference genome was not available for the species sequenced, a reference transcriptome was *de novo* assembled using Trinity (v2.8.4) from the combined reads of one paired-end library from each life stage (with settings described above). A mapping-based estimation of transcript abundance was then obtained using Salmon quant v0.14.1.2 (using default settings except specifying paired-end, stranded reads (SF), discarding orphan quasi, validating mappings and mimicking Bowtie) (Patro *et al.* 2017). Differentially expressed transcripts were identified using DESeq2 v2.11.40.6 (using default settings with the following changes: setting input data to Transcripts Per Kilobase Million (TPM) values generated by Salmon, outputting normalised counts table and no independent filtering) (Love *et al.* 2014). The DESeq2 result file was filtered (Filter v 1.1.0) on the adjusted p-value column ( $\leq 0.05$ ) to obtain DEGs.



Separate lists of up- and down-regulated DEGs were obtained by filtering for positive and negative values in the log fold change column of the DESeq2 result file. These lists were re-formatted (using FASTA-to-TABULAR v1.1.1, Cut v1.0.2, Sort v1.1.1, Join v1.1.2 and TABULAR-to-FASTA v1.1.1 tools) to generate simple gene ID-to-sequence lists of DEGs in FASTA format. The top BLAST hit from the UniProtKB/Swiss-Prot database (The UniProt Consortium 2018) was obtained using NCBI BLAST+ blastx v0.3.3 (using default settings but selecting blastx analysis) and Blast top hit descriptions v0.0.9, and was used to annotate DEG sequences (Altschul *et al.* 1997; Camacho *et al.* 2009; Cock *et al.* 2013; Cock *et al.* 2015). For the top 15 DEGs, QuickGO (Binns *et al.* 2009) and UniProtKB were used to manually search for gene ontology (GO) and function. For lists of DEGs upregulated at each life stage, PANTHER 17.0 [<http://www.pantherdb.org/>; (Mi *et al.* 2021)] was used via The Gene Ontology Resource website to perform a GO statistical overrepresentation analysis for biological processes (Ashburner *et al.* 2000; Gene Ontology Consortium 2021). PANTHER analyses used *Oryzias latipes* as the reference, used Fisher's exact test, calculated false discovery rate (FDR), used an FDR-adjusted p-value of  $< 0.05$  and filtered results for GO terms with fold enrichment  $\geq 6$  (*i.e.*, highly overrepresented).

## Results

### *Opsin gene expression*

Opsin gene expression was analysed across ontogeny in eight species in Holocentridae (four species per subfamily). Phylogenetic reconstruction resolved the class of each opsin gene (Fig. 1) and quantitative opsin gene expression analyses revealed stage-specific expression patterns (Fig. 2, Table 1). At pre-settlement, *S. rubrum* (the only species obtained at this stage) expressed one rod opsin and eight cone opsins: the rod-specific *rh1* (mean  $\pm$  s.e.m.,  $78 \pm 5\%$  of total opsin gene expression), violet-blue-sensitive *sws2a* ( $89 \pm 9\%$  of single cone opsin gene expression) and *sws2b* ( $11 \pm 9\%$  of single cone opsin gene expression), five green-sensitive *rh2s* (*rh2-1* – *rh2-5*:  $7 \pm 1$  –  $34 \pm 3\%$  of double cone opsin gene expression), and red-sensitive *lws* ( $3 \pm 2\%$  of double cone opsin gene expression).

At settlement, all species in Holocentridae expressed one rod opsin and six to eight cone opsins: an *rh1* (Holocentrinae:  $97 \pm 3\%$ , Myripristinae:  $89 \pm 1\%$ ), *sws2a* (Holocentrinae:  $94.2 \pm 3.6\%$ ; Myripristinae:  $97.6 \pm 1\%$ ), *sws2b* (Holocentrinae:  $5.8 \pm 3.6\%$ ; Myripristinae:  $2.4 \pm 1\%$ ), *lws* (Holocentrinae:  $0.3 \pm 0.16\%$ ; Myripristinae:  $1.1 \pm 0.5\%$ ) and several *rh2* paralogs

(Holocentrinae:  $63 \pm 6\%$ ; Myripristinae:  $96.4 \pm 1\%$ ; % for the most highly expressed paralog, *rh2-1*) (Fig. 2, Table 1). Most species in Holocentrinae expressed four or five *rh2* paralogs at settlement, and one of these was expressed at low levels ( $\leq 0.5\%$ ) in every species. All species in Myripristinae expressed three *rh2* paralogs at settlement, with two of these expressed at low levels ( $\leq 1.5\%$  per paralog). Between settlement and adulthood, all holocentrids increased rod opsin gene expression, decreased cone opsin gene expression, and stopped expressing three to four cone opsin genes (*sws2b*, *lws* and 1-2 *rh2s*).

As adults, all shallow-water holocentrids retained some similarities in their opsin gene repertoires, expressing one rod opsin and two to three cone opsins. All species expressed an *rh1* (Holocentrinae:  $97.4 \pm 0.9\%$ ; Myripristinae:  $99.6 \pm 0.1\%$ ) and *sws2a* (100% in both subfamilies) opsin gene, while the variation in *rh2* paralogs remained, with two *rh2* paralogs expressed in Holocentrinae (*rh2-1*:  $57 \pm 2\%$ , *rh2-2*:  $43 \pm 2\%$ ) and only one in Myripristinae (100%) (Fig. 2, Table 1). Finally, an adult of the deeper-dwelling species from Myripristinae (*Ostichthys* sp.) expressed a simpler opsin gene repertoire than the shallow-water species, with one *rh1* gene (99.6%) and one *rh2* paralog (100%). Overall, opsin gene expression differed between the subfamilies across development, with differences in per-gene expression levels and the number of opsin classes and *rh2* paralogs expressed. Most notably, Myripristinae showed a greater increase in rod opsin gene expression post-settlement than Holocentrinae and expressed one less *rh2* paralog upon maturity.

### *Whole-retina differential gene expression*

Differential gene expression across the entire retinal transcriptome was examined over development for *S. punctatissimum*. Transcriptomes separated distinctly by life stage in a PCA (Fig. 3A). Whole-transcriptome analyses revealed that a total of 8,395 out of 54,094 transcripts were differentially expressed over ontogeny (adjusted p-value  $< 0.05$ ). Upon annotation, this total was refined to 4,637 differentially expressed genes (DEGs) (*i.e.*, 8.6% of transcripts). Of the DEGs, 1,394 were upregulated in settlement larvae (30.1%) and 3,243 were upregulated in adults (69.9%) (Fig. 3B). The top 15 differentially expressed genes (DEGs) upregulated in larval retinas were largely involved in cell differentiation/proliferation and cellular structure. Conversely, the top 15 DEGs upregulated in adults were primarily involved in visual perception and aerobic respiration (Table 2). Notably, the differentially expressed genes also included several developmental transcription factors (TFs) (Fogg and de

Busserolles 2022). In the larvae, this included upregulation of *otx2* and *otx5*, while in adults, the TFs, *nr2e3* and *rorb* were upregulated.

Over development, 5 GO terms were found to be highly enriched in settlement larvae (Table S3) while 22 were highly enriched in adults (Table S4) (FDR-adjusted p-value < 0.05 and fold enrichment  $\geq 6$ ). All GO terms enriched in larvae were related to development, *e.g.*, cell morphogenesis involved in neuron differentiation (GO:0048667), and neurogenesis (GO:0022008). In contrast, most of the GO terms in adults were related to metabolism, *e.g.*, ATP metabolic process (GO:0046034) and aerobic respiration (GO:0009060). Notably, no terms relating to visual perception were among the most highly enriched GO terms at either stage.

## Discussion

### *Opsin gene expression over development*

Teleosts are known to tune their spectral sensitivities to the light environment over development by changing their relative opsin gene expression levels and/or by switching between gene classes or copies (Shand *et al.* 2002; Cheng and Flammarique 2007; Carleton *et al.* 2008; Savelli *et al.* 2018; Musilova *et al.* 2019). Holocentrids are no exception. Developmental changes in holocentrid opsin gene expression correlated well with their switch to a nocturnal, reef-dwelling lifestyle. For example, holocentrids increased their relative *rh1* expression by nearly 20% over development (Fig. 2, Table 1). Furthermore, they stopped expressing most of their cone opsin genes, only retaining cone opsins sensitive to the mid-range (blue – green; *sws2a* and *rh2*) wavelengths that dominate the reef at night. This is in contrast with changes in most diurnal fishes, which do not reduce the number of cone opsins expressed over ontogeny (Takechi and Kawamura 2005; Cheng and Flammarique 2007; Shand *et al.* 2008; Cortesi *et al.* 2016; Tettamanti *et al.* 2019; Chang *et al.* 2020).

Among the cone opsin genes, ontogenetic changes in *rh2* expression are particularly interesting in the holocentrids. With eight copies, holocentrids have the highest number of genomic *rh2* paralogs of any teleost species (Musilova *et al.* 2019). It should be noted that our phylogeny was insufficiently weighted to resolve some of the *rh2* gene clades (Musilova and Cortesi 2021). Nevertheless, our results show that most of these *rh2* paralogs, along with several other cone opsin genes, were only expressed at early life stages (Fig. 2, Table 1).

Moreover, some of these genes (*e.g.*, *lws*) were expressed at low levels that may not be functionally relevant to vision. Instead, these lowly expressed paralogs may have an exclusively developmental function, similar to the sequentially expressed opsins that mediate photoreceptor development in salmonoid and cyprinid fishes (Raymond *et al.* 1995; Stenkamp *et al.* 1996; Takechi and Kawamura 2005; Cheng *et al.* 2007). However, *rh2* was the only cone opsin gene subclass expressed in all stages/species in Holocentridae (Fig. 4) and this subclass is sensitive to wavelengths present in the light environment of these fishes throughout life. Thus, it is possible that the different *rh2* paralogs serve a visual purpose, allowing the fish to switch between opsin gene palettes during ontogeny for more precise control over spectral tuning (known as subfunctionalisation), similar to findings in cichlids (Spady *et al.* 2006).

Although differences in opsin gene expression in teleosts are often explained by the light environment and species-specific ecologies, phylogenetic forces also exert control (Tettamanti *et al.* 2019; Carleton *et al.* 2008; Stieb *et al.* 2016). This may also be the case in holocentrids. Although shallow-dwelling species share a similar light environment at every life stage, the two subfamilies only showed similar opsin gene expression early in life. As adults, shallow-dwelling Myripristinae expressed fewer cone opsin genes and higher *rh1* levels than Holocentrinae. This more extreme adaptation for dim-light vision in shallow-dwelling *Myripristis* spp. may be because they are more closely related to deep-dwelling *Ostichthys* spp., resulting in greater similarity to their deep-water relatives. Notably, this potential phylogenetic inertia did not seem to completely negate the influence of ecological drivers. As such, fewer cone opsins were expressed in an adult from the deeper-dwelling genus *Ostichthys* (Myripristinae) compared to shallow-dwelling Myripristinae representatives, aligning well with the depth-related narrowing of spectral sensitivities observed in other teleosts (Schweikert *et al.* 2018).

#### *Transcription factor (TF) expression over development*

The developmental changes in rod and cone opsin gene expression in the holocentrids were accompanied by stage-specific upregulation of TFs linked to photoreceptor development (Fogg and de Busserolles 2022). Specifically, the larvae showed upregulation of *otx2* and *otx5*, both of which are linked to the differentiation of photoreceptors (Nishida *et al.* 2003; Sauka-Spengler *et al.* 2001; Plouhinec *et al.* 2005). These findings further validate the

ongoing developmental changes occurring in the holocentrid retina at settlement. Conversely, adult holocentrids showed upregulation of *nr2e3* and *rorb*, both of which are involved in the development of rod photoreceptors (Chen *et al.* 2005; Jia *et al.* 2009; Xie *et al.* 2019). The upregulation of TFs involved in rod formation in adults correlates well with the higher rod densities (Fogg *et al.* 2022) and rod opsin gene expression at this stage. Additionally, *nr2e3* is also known to suppress the expression of numerous cone-specific genes (Chen *et al.* 2005), and thus, may also play a role in the developmental decrease in cone opsin gene expression in the holocentrids.

It should be noted that several TFs linked to photoreceptor development in other vertebrates (*i.e.*, *nrl*, *thrb*, *six7* and *foxq2*) were not differentially expressed between settlement and adulthood in the holocentrids. The lack of differential expression of *nrl*, a TF necessary for rod specification in mammals and zebrafish (Oel *et al.* 2020), implies that holocentrids utilise an alternative *nrl*-independent pathway to specify rod fate during ontogeny, similar to Atlantic cod (Valen *et al.* 2016). Similarly, the TFs, *thrb*, *six7* and *foxq2*, were not differentially expressed between settlement and adulthood. These TFs have been linked to the development of red (*lws*) cones (Volkov *et al.* 2020), green (*rh2*) cones (Ogawa *et al.* 2015) and blue (*sws2*) cones (Ogawa *et al.* 2021), respectively. Thus, the lack of differential expression of these TFs is not so surprising given that *lws*, *rh2* and *sws2* did not show increased expression between settlement and adulthood in the holocentrids. Although these TFs may still play a role in the development of the different cone subtypes prior to settlement.

### *Retinal gene expression over development*

Around 8.6% of annotated retinal transcripts were differentially expressed over development in holocentrids (Fig. 3). Although whole-retina changes in gene expression have not been studied in teleosts that undergo major ecological shifts, some insights can be gained from other taxa. For example, butterflies show developmental changes in visual gene expression alongside changes in eye structure and therefore, some of the stage-specific expression differences were attributed to cellular composition (Ernst and Westerman 2021). Similarly, since the holocentrid retina undergoes cellular remodelling over development (Fogg *et al.* 2022), it is likely that some of the expression changes simply facilitate these structural changes. Indeed, numerous processes relating to cellular development (*e.g.*, cell

morphogenesis and generation of neurons) and several genes involved in eye formation and patterning (*e.g.*, *rx3* and *six3*) (Carl *et al.* 2002; Loosli *et al.* 2003; Ogawa *et al.* 2015) were upregulated in settlement larvae [Table S3; (Fogg and de Busserolles 2022)]. Nevertheless, similar to findings in frogs (Valero *et al.* 2017; Schott *et al.* 2022), several of the differentially expressed genes were correlated with ecological changes over development. Most notably, genes involved in cone- or rod-based photoreception were upregulated in larval or adult holocentrids respectively (Fogg and de Busserolles 2022), aligning with their switch from bright to dim environments.

Finally, the most highly upregulated genes in adults were mainly involved in photoreception and aerobic respiration (Table 2), while most of the GO terms enriched in adults were related to aerobic respiration and metabolism (Table S4). The upregulation of photoreception genes in adults is congruent with their higher photoreceptor densities (Fogg *et al.* 2022) and implies that adults have a higher investment in vision than larvae. In contrast, the enrichment of genes and processes linked to metabolism may be related to general physiological differences between settlement larvae and adults (*e.g.*, potentially increased vascularisation and therefore, oxygen transport in adults), as previously suggested for frogs (Schott *et al.* 2022). Indeed, since the retina is one of the most energy-consuming organs in the body (Joyal *et al.* 2018), the significant changes to its composition that occur over development would likely result in substantial changes to its metabolic demands. Overall, in holocentrids, developmental changes to retinal gene expression align well with the retinal structure and ecological demands of each life stage.

## Conclusion

The holocentrid visual system adapted to life in dim light over ontogeny. At the molecular level, they increased rod opsin gene expression, narrowed the cone opsin gene expression repertoire from 8 to 1-4 cone opsins, and shifted from enrichment of neurogenesis and cell differentiation/proliferation to phototransduction and metabolism. Together, this suggests that ecology drives visual development in Holocentridae. However, subfamily-specific differences in the degree of scotopic specialisation emerged over development (*i.e.*, higher rod opsin gene expression in Myripristinae) and these were correlated with phylogenetic relatedness to deep-water representatives rather than ecology. This suggests that the

development of the holocentrid retina may also be somewhat driven by phylogeny. Future studies on visual development in other nocturnal reef fishes as well as other marine fish families with both shallow- and deep-water forms, such as Anomalopidae (flashlight fishes) and Engraulidae (anchovies), may provide further insights into the ecological and phylogenetic drivers of the development of dim-light vision.

## **Acknowledgements**

We acknowledge the Dingaal, Ngurrumungu and Thanhil peoples as traditional owners of the lands and waters of the Lizard Island region from where specimens were collected. We also acknowledge the traditional owners of the land on which the University of Queensland is situated, the Turrbal/Jagera people. We would like to thank the staff at Lizard Island Research Station (LIRS), Dr Anne Hoggett and Dr Lyle Vail, as well as the staff at the Centre of Island Research and Environmental Observatory (CRIOBE) for support during field work. We also thank Cairns Marine for supplying animals. We thank Janette Edson from the QBI Genomics Facility and staff at Novogene Co., Ltd for library preparation and transcriptome sequencing. Finally, we would like to thank Professor Mark McCormick and his team for generously lending us their light traps and assisting with some animal collections.

## **Competing interests**

No competing interests declared.

## **Funding**

This research was supported by the Australian Research Council (ARC) [DE180100949 awarded to F.d.B.] and the Queensland Brain Institute (QBI). F.d.B., F.C. and N.J.M. were supported by the ARC [DE180100949, DE200100620 and FL140100197, respectively]; L.G.F. was supported by the Australian Government and the University of Queensland (UQ) [Research Training Program Stipend] and QBI [Research Higher Degree Top Up Scholarship]; D.L. was supported by the Institute of Coral Reefs of the Pacific (IRCP).



## Data availability

Most data are provided in the main text and/or supplementary information. Additional data are available via the University of Queensland's eSpace: <https://doi.org/10.48610/ad48066>.

## References

- Afgan, E., Baker, D., Batut, B., van den Beek, M., Bouvier, D., Čech, M., Chilton, J., Clements, D., Coraor, N., Grüning, B. A., Guerler, A., Hillman-Jackson, J., Hiltmann, S., Jalili, V., Rasche, H., Soranzo, N., Goecks, J., Taylor, J., Nekrutenko, A., and Blankenberg, D. 2018. 'The Galaxy platform for accessible, reproducible and collaborative biomedical analyses: 2018 update', *Nucleic Acids Research*, **46**, W537-W44.
- Allen, G. R., and Erdmann, M. V. 2012. *Reef fishes of the East Indies* (University of Hawai'i Press: Perth, Australia).
- Allen, G.R., and Steene, R.C. 1988. *Fishes of Christmas Island Indian Ocean* (Christmas Island Natural History Association: Christmas Island, Australia).
- Altschul, S. F., Madden, T. L., Schäffer, A. A., Zhang, J., Zhang, Z., Miller, W., and Lipman, D. J. 1997. 'Gapped BLAST and PSI-BLAST: a new generation of protein database search programs', *Nucleic Acids Research*, **25**, 3389-402.
- Ashburner, M., Ball, C. A., Blake, J. A., Botstein, D., Butler, H., Cherry, J. M., Davis, A. P., Dolinski, K., Dwight, S. S., Eppig, J. T., Harris, M. A., Hill, D. P., Issel-Tarver, L., Kasarskis, A., Lewis, S., Matese, J. C., Richardson, J. E., Ringwald, M., Rubin, G. M., and Sherlock, G. 2000. 'Gene Ontology: tool for the unification of biology', *Nature Genetics*, **25**, 25-29.
- Bacchet, P., Zysman, T., and Lefevre, Y. 2016. *Guide des poissons de Tahiti et ses îles* (Au vent des îles: Tahiti).
- Besson, M., Gache, C., Brooker, R. M., Moussa, R. M., Waqalevu, V. P., LeRohellec, M., Jaouen, V., Peyrusse, K., Berthe, C., Bertucci, F., Jacob, H., Brié, C., Wan, B., Galzin, R., and Lecchini, D. 2017. 'Consistency in the supply of larval fishes among coral reefs in French Polynesia', *PLOS ONE*, **12**, e0178795.
- Binns, D., Dimmer, E., Huntley, R., Barrell, D., O'Donovan, C., and Apweiler, R. 2009. 'QuickGO: a web-based tool for Gene Ontology searching', *Bioinformatics*, **25**, 3045-46.
- Boehlert, G. W. 1996. 'Larval dispersal and survival in tropical reef fishes.' in Nicholas V. C.; Roberts Polunin, Callum M. (ed.), *Reef Fisheries* (Springer Netherlands: Dordrecht).
- Bowmaker, J. K. 2008. 'Evolution of vertebrate visual pigments', *Vision Res*, **48**, 2022-41.
- Bozzano, A., Pankhurst, P. M., and Sabates, A. 2007. 'Early development of eye and retina in lanternfish larvae', *Vis Neurosci*, **24**, 423-36.
- Camacho, C., Coulouris, G., Avagyan, V., Ma, N., Papadopoulos, J., Bealer, K., and Madden, T. L. 2009. 'BLAST+: architecture and applications', *BMC Bioinformatics*, **10**, 421.
- Carl, M., Loosli, F., and Wittbrodt, J. 2002. 'Six3 inactivation reveals its essential role for the formation and patterning of the vertebrate eye', *Development*, **129**, 4057-63.
- Carleton, K. L., Escobar-Camacho, D., Stieb, S. M., Cortesi, F., and Marshall, N. J. 2020. 'Seeing the rainbow: mechanisms underlying spectral sensitivity in teleost fishes', *J Exp Biol*, **223**, jeb193334.
- Carleton, K. L., Spady, T. C., Streelman, J. T., Kidd, M. R., McFarland, W. N., and Loew, E. R. 2008. 'Visual sensitivities tuned by heterochronic shifts in opsin gene expression', *BMC biology*, **6**, 22-22.
- Chang, C.-H., Wang, Y.-C., Shao, Y. T., and Liu, S.-H. 2020. 'Phylogenetic analysis and ontogenetic changes in the cone opsins of the western mosquitofish (*Gambusia affinis*)', *PLOS ONE*, **15**, e0240313.
- Chen, J., Rattner, A., and Nathans, J. 2005. 'The rod photoreceptor-specific nuclear receptor Nr2e3 represses transcription of multiple cone-specific genes', *J Neurosci*, **25**, 118-29.
- Cheng, C. L., and Flamarique, I. N. 2007. 'Chromatic organization of cone photoreceptors in the retina of rainbow trout: single cones irreversibly switch from UV (SWS1) to blue (SWS2) light sensitive opsin during natural development', *Journal of Experimental Biology*, **210**, 4123-35.
- Cheng, C. L., Gan, K. J., and Flamarique, I. N. 2007. 'The ultraviolet opsin is the first opsin expressed during retinal development of salmonid fishes', *Invest Ophthalmol Vis Sci*, **48**, 866-73.
- Cock, P. J. A., Chilton, J. M., Grüning, B., Johnson, J. E., and Soranzo, N. 2015. 'NCBI BLAST+ integrated into Galaxy', *GigaScience*, **4**, 39.

- Cock, P. J., Grüning, B. A., Paszkiewicz, K., and Pritchard, L. 2013. 'Galaxy tools and workflows for sequence analysis with applications in molecular plant pathology', *PeerJ*, **1**, e167.
- Cortesi, F., Mitchell, L. J., Tettamanti, V., Fogg, L. G., de Busserolles, F., Cheney, K. L., and Marshall, N. J. 2020. 'Visual system diversity in coral reef fishes', *Seminars in Cell & Developmental Biology*, **106**, 31-42.
- Cortesi, F., Musilová, Z., Stieb, S. M., Hart, N. S., Siebeck, U. E., Cheney, K. L., Salzburger, W., and Marshall, N. J. 2016. 'From crypsis to mimicry: changes in colour and the configuration of the visual system during ontogenetic habitat transitions in a coral reef fish', *Journal of Experimental Biology*, **219**, 2545-58.
- Cronin, T., Johnsen, S., Marshall, J., and Warrant, E. 2014. 'Light and the Optical Environment.' in, *Visual Ecology* (Princeton University Press: Princeton and Oxford).
- Dalton, B. E., de Busserolles, F., Marshall, N. J., and Carleton, K. L. 2017. 'Retinal specialization through spatially varying cell densities and opsin coexpression in cichlid fish', *Journal of Experimental Biology*, **220**, 266-77.
- de Busserolles, F., Cortesi, F., Fogg, L., Stieb, S. M., Luehrmann, M., and Marshall, N. J. 2021. 'The visual ecology of Holocentridae, a nocturnal coral reef fish family with a deep-sea-like multibank retina', *J Exp Biol*, **224**, jeb233098.
- de Busserolles, F., Cortesi, F., Helvik, J. V., Davies, W. I. L., Templin, R. M., Sullivan, R. K. P., Michell, C. T., Mountford, J. K., Collin, S. P., Irigoien, X., Kaartvedt, S., and Marshall, J. 2017. 'Pushing the limits of photoreception in twilight conditions: The rod-like cone retina of the deep-sea pearlsides', *Science Advances*, **3**, eaao4709.
- de Busserolles, F., Fogg, L., Cortesi, F., and Marshall, J. 2020. 'The exceptional diversity of visual adaptations in deep-sea teleost fishes', *Seminars in Cell & Developmental Biology*, **106**, 20-30.
- de Busserolles, F., Marshall, N. J., and Collin, S. P. 2014. 'The eyes of lanternfishes (Myctophidae, Teleostei): novel ocular specializations for vision in dim light', *J Comp Neurol*, **522**, 1618-40.
- Dornburg, A., Moore, J. A., Webster, R., Warren, D. L., Brandley, M. C., Iglesias, T. L., Wainwright, P. C., and Near, T. J. 2012. 'Molecular phylogenetics of squirrelfishes and soldierfishes (Teleostei: Beryciformes: Holocentridae): reconciling more than 100 years of taxonomic confusion', *Mol Phylogenet Evol*, **65**, 727-38.
- Douglas, R. H., Hunt, D. M., and Bowmaker, J. K. 2003. 'Spectral Sensitivity Tuning in the Deep-Sea.' in Shaun P. Collin and N. Justin Marshall (eds.), *Sensory Processing in Aquatic Environments* (Springer New York: New York, NY).
- Edgar, R. C. 2004. 'MUSCLE: multiple sequence alignment with high accuracy and high throughput', *Nucleic Acids Research*, **32**, 1792-97.
- Ernst, D. A., and Westerman, E. L. 2021. 'Stage- and sex-specific transcriptome analyses reveal distinctive sensory gene expression patterns in a butterfly', *BMC Genomics*, **22**, 584.
- Fogg, L., and de Busserolles, F. 2022. 'Data from: Development of dim-light vision in the nocturnal coral reef fish family, Holocentridae', *The University of Queensland*, <https://doi.org/10.48610/ad48066>.
- Fogg, L. G., Cortesi, F., Lecchini, D., Gache, C., Marshall, N.J., and de Busserolles, F. 2022. 'Development of dim-light vision in the nocturnal reef fish family Holocentridae II: Retinal morphology', *Journal of Experimental Biology*, **In press**.
- Frau, S., Paullada-Salmerón, J. A., Paradiso, I., Cowan, M. E., Martín-Robles, A. J., and Muñoz-Cueto, J. A. 2022. 'From Embryo to Adult Life: Differential Expression of Visual Opsins in the Flatfish *Solea senegalensis* Under Different Light Spectra and Photoperiods', *Frontiers in Marine Science*, **9**.
- Gene Ontology Consortium. 2021. 'The Gene Ontology resource: enriching a GOLD mine', *Nucleic Acids Res*, **49**, D325-d34.
- Gladfelter, W. B., and Johnson, W. S. 1983. 'Feeding Niche Separation in a Guild of Tropical Reef Fishes (Holocentridae)', *Ecology*, **64**, 552-63.
- Greenfield, D. W. 2002. 'Holocentridae: squirrelfishes (soldierfishes).' in K. E. Carpenter (ed.), *The living marine resources of the Western Central Atlantic* (Food and Agriculture Organization of the United Nations: Rome, Italy).
- Greenfield, D. W., Randall, J. E., and Psomadakis, P. N. 2017. 'A review of the soldierfish genus *Ostichthys* (Beryciformes: Holocentridae), with descriptions of two new species from Myanmar', *Journal of the Ocean Science Foundation*, **26**, 1-33.
- Helfman, G., Collette, B. B., Facey, D. E., and Bowen, B. W. 2009. *The diversity of fishes: biology, evolution, and ecology* (John Wiley & Sons: West Sussex, UK).
- Helvik, J. V., Drivenes, Ø., Harboe, T., and Seo, H.-C. 2001. 'Topography of different photoreceptor cell types in the larval retina of Atlantic halibut (*Hippoglossus hippoglossus*)', *Journal of Experimental Biology*, **204**, 2553-9.

- Jia, L., Oh, E. C. T., Ng, L., Srinivas, M., Brooks, M., Swaroop, A., and Forrest, D. 2009. 'Retinoid-related orphan nuclear receptor RORbeta is an early-acting factor in rod photoreceptor development', *Proc Natl Acad Sci U S A*, **106**, 17534-39.
- Job, S. D., and Bellwood, D. R. 2000. 'Light sensitivity in larval fishes: Implications for vertical zonation in the pelagic zone', *Limnology and Oceanography Bulletin*, **45**, 362-71.
- Job, S. D., and Shand, J. 2001. 'Spectral sensitivity of larval and juvenile coral reef fishes: implications for feeding in a variable light environment', *Marine Ecology Progress Series*, **214**, 267-77.
- Joyal, J.-S., Gantner, M. L., and Smith, L. E. H. 2018. 'Retinal energy demands control vascular supply of the retina in development and disease: The role of neuronal lipid and glucose metabolism', *Prog Retin Eye Res*, **64**, 131-56.
- King, J. R., and McFarlane, G. A. 2003. 'Marine fish life history strategies: applications to fishery management', *Fisheries Management and Ecology*, **10**, 249-64.
- Lamb, T. D. 2013. 'Evolution of phototransduction, vertebrate photoreceptors and retina', *Prog Retin Eye Res*, **36**, 52-119.
- Lecchini, D., Dufour, V., Carleton, J., Strand, S., and Galzin, R. 2004. 'Estimating the patch size of larval fishes during colonization on coral reefs', *Journal of Fish Biology*, **65**, 1142-46.
- Lieske, E. and Myers, R. 1994. *Coral reef fishes. Indo-Pacific & Caribbean including the Red Sea*. (Harper Collins).
- Loosli, F., Staub, W., Finger-Baier, K. C., Ober, E. A., Verkade, H., Wittbrodt, J., and Baier, H. 2003. 'Loss of eyes in zebrafish caused by mutation of chokh/rx3', *EMBO Rep*, **4**, 894-9.
- Love, M. I., Huber, W., and Anders, S. 2014. 'Moderated estimation of fold change and dispersion for RNA-seq data with DESeq2', *Genome Biology*, **15**, 550.
- Luehrmann, M., Carleton, K. L., Cortesi, F., Cheney, K. L., and Marshall, N. J. 2019. 'Cardinalfishes (Apogonidae) show visual system adaptations typical of nocturnally and diurnally active fish', *Mol Ecol*, **28**, 3025-41.
- Luehrmann, M., Cortesi, F., Cheney, K. L., de Busserolles, F., and Marshall, N. J. 2020. 'Microhabitat partitioning correlates with opsin gene expression in coral reef cardinalfishes (Apogonidae)', *Functional Ecology*, **34**, 1041-52.
- Lupše, N., Cortesi, F., Freese, M., Marohn, L., Pohlmann, J.-D., Wysujack, K., Hanel, R., and Musilova, Z. 2021. 'Visual Gene Expression Reveals a cone-to-rod Developmental Progression in Deep-Sea Fishes', *Mol Biol Evol*, **38**, 5664-77.
- Lythgoe, J. N. 1979. *The Ecology of Vision* (Clarendon Press).
- Mader, M. M., and Cameron, D. A. 2004. 'Photoreceptor differentiation during retinal development, growth, and regeneration in a metamorphic vertebrate', *J Neurosci*, **24**, 11463-72.
- Malmstrøm, M., Matschiner, M., Tørresen, O. K., Jakobsen, K. S., and Jentoft, S. 2017. 'Whole genome sequencing data and de novo draft assemblies for 66 teleost species', *Scientific Data*, **4**, 160132.
- Mi, H., Ebert, D., Muruganujan, A., Mills, C., Albou, L.-P., Mushayamaha, T., and Thomas, P. D. 2021. 'PANTHER version 16: a revised family classification, tree-based classification tool, enhancer regions and extensive API', *Nucleic Acids Research*, **49**, D394-D403.
- Miller, M. A., Pfeiffer, W., and Schwartz, T. 2010. "Creating the CIPRES Science Gateway for inference of large phylogenetic trees." In *2010 Gateway Computing Environments Workshop (GCE)*, 1-8.
- Moore, J., A. Polanco Fernandez, B. Russell and J.D. McEachran. 2015. "*Myripristis jacobus*." In *The IUCN Red List of Threatened Species 2015*.
- Musilova, Z., and Cortesi, F. 2021. 'Multiple ancestral and a plethora of recent gene duplications during the evolution of the green sensitive opsin genes (*RH2*) in teleost fishes', *bioRxiv*, 10.1101/2021.05.11.443711.
- Musilova, Z., Cortesi, F., Matschiner, M., Davies, W. I. L., Patel, J. S., Stieb, S. M., de Busserolles, F., Malmstrom, M., Torresen, O. K., Brown, C. J., Mountford, J. K., Hanel, R., Stenkamp, D. L., Jakobsen, K. S., Carleton, K. L., Jentoft, S., Marshall, J., and Salzburger, W. 2019. 'Vision using multiple distinct rod opsins in deep-sea fishes', *Science*, **364**, 588-92.
- Musilova, Z., Salzburger, W., and Cortesi, F. 2021. 'The Visual Opsin Gene Repertoires of Teleost Fishes: Evolution, Ecology, and Function', *Annu Rev Cell Dev Biol*, **37**, 441-68.
- Nelson, J. S. 1994. *Fishes of the world* (John Wiley & Sons, Inc.: New York).
- Nishida, A., Furukawa, A., Koike, C., Tano, Y., Aizawa, S., Matsuo, I., and Furukawa, T. 2003. 'Otx2 homeobox gene controls retinal photoreceptor cell fate and pineal gland development', *Nature Neuroscience*, **6**, 1255-63.
- Oel, A. P., Neil, G. J., Dong, E. M., Balay, S. D., Collett, K., and Allison, W. T. 2020. 'Nrl Is Dispensable for Specification of Rod Photoreceptors in Adult Zebrafish Despite Its Deeply Conserved Requirement Earlier in Ontogeny', *iScience*, **23**, 101805.
- Ogawa, Y., Shiraki, T., Fukada, Y., and Kojima, D. 2021. 'Foxq2 determines blue cone identity in zebrafish', *Science Advances*, **7**, eabi9784.

- Ogawa, Y., Shiraki, T., Kojima, D., and Fukada, Y. 2015. 'Homeobox transcription factor Six7 governs expression of green opsin genes in zebrafish', *Proc Biol Sci*, **282**, 20150659-59.
- Patro, R., Duggal, G., Love, M. I., Irizarry, R. A., and Kingsford, C. 2017. 'Salmon provides fast and bias-aware quantification of transcript expression', *Nature Methods*, **14**, 417-19.
- Plouhinec, J. L., Leconte, L., Sauka-Spengler, T., Bovolenta, P., Mazan, S., and Saule, S. 2005. 'Comparative analysis of gnathostome Otx gene expression patterns in the developing eye: implications for the functional evolution of the multigene family', *Dev Biol*, **278**, 560-75.
- Rambaut, A., and Drummond, A. J. 2012. "FigTree version 1.4.0." In *Computer program distributed by the author*. Institute of Evolutionary Biology, University of Edinburgh.
- Randall, J. E. 1998. 'Revision of the Indo-Pacific squirrelfishes (Beryciformes: Holocentridae: Holocentrinae) of the genus *Sargocentron*, with descriptions of four new species', *Indo-Pac. Fish*, **27**, 105.
- Raymond, P. A., Barthel, L. K., and Curran, G. A. 1995. 'Developmental patterning of rod and cone photoreceptors in embryonic zebrafish', *J Comp Neurol*, **359**, 537-50.
- Ronquist, F., Teslenko, M., van der Mark, P., Ayres, D. L., Darling, A., Höhna, S., Larget, B., Liu, L., Suchard, M. A., and Huelsenbeck, J. P. 2012. 'MrBayes 3.2: efficient Bayesian phylogenetic inference and model choice across a large model space', *Syst Biol*, **61**, 539-42.
- Roux, N., Miura, S., Dussene, M., Tara, Y., Lee, F., de Bernard, S., Reynaud, M., Salis, P., Barua, A., Boulahtouf, A., Balaguer, P., Gauthier, K., Lecchini, D., Gibert, Y., Besseau, L., and Laudet, V. 2022. 'The multi-level regulation of clownfish metamorphosis by thyroid hormones', *bioRxiv*, 10.1101/2022.03.04.482938.
- Sampey, A., McKinnon, A. D., Meekan, M. G., and McCormick, M. I. 2007. 'Glimpse into guts: A first overview of the feeding of tropical shorefish larvae', *Marine Ecology Progress Series*, **339**, 243-57.
- Sauka-Spengler, T., Baratte, B., Shi, D., and Mazan, S. 2001. 'Structure and expression of an Otx5-related gene in the dogfish *Scyliorhinus canicula*: evidence for a conserved role of Otx5 and Crx genes in the specification of photoreceptors', *Development Genes and Evolution*, **211**, 533-44.
- Savelli, I., Novales Flamarique, I., Iwanicki, T., and Taylor, J. S. 2018. 'Parallel opsin switches in multiple cone types of the starry flounder retina: tuning visual pigment composition for a demersal life style', *Scientific Reports*, **8**, 4763.
- Schindelin, J., Arganda-Carreras, I., Frise, E., Kaynig, V., Longair, M., Pietzsch, T., Preibisch, S., Rueden, C., Saalfeld, S., Schmid, B., Tinevez, J.-Y., White, D. J., Hartenstein, V., Eliceiri, K., Tomancak, P., and Cardona, A. 2012. 'Fiji: an open-source platform for biological-image analysis', *Nature Methods*, **9**, 676.
- Schott, R. K., Bell, R. C., Loew, E. R., Thomas, K. N., Gower, D. J., Streicher, J. W., and Fujita, M. K. 2022. 'Transcriptomic evidence for visual adaptation during the aquatic to terrestrial metamorphosis in leopard frogs', *BMC biology*, **20**, 138.
- Schweikert, L. E., Fitak, R. R., Caves, E. M., Sutton, T. T., and Johnsen, S. 2018. 'Spectral sensitivity in ray-finned fishes: diversity, ecology, and shared descent', *J Exp Biol*, **221**, jeb.189761.
- Shand, J. 1997. 'Ontogenetic changes in retinal structure and visual acuity: a comparative study of coral-reef teleosts with differing post-settlement lifestyles', *Environmental Biology of Fishes*, **49**, 307-22.
- Shand, J., Davies, W. L., Thomas, N., Balmer, L., Cowing, J. A., Pointer, M., Carvalho, L. S., Trezise, A. E., Collin, S. P., Beazley, L. D., and Hunt, D. M. 2008. 'The influence of ontogeny and light environment on the expression of visual pigment opsins in the retina of the black bream, *Acanthopagrus butcheri*', *J Exp Biol*, **211**, 1495-503.
- Shand, J., Hart, N. S., Thomas, N., and Partridge, J. C. 2002. 'Developmental changes in the cone visual pigments of black bream *Acanthopagrus butcheri*', *J Exp Biol*, **205**, 3661-7.
- Spady, T. C., Parry, J. W. L., Robinson, P. R., Hunt, D. M., Bowmaker, J. K., and Carleton, K. L. 2006. 'Evolution of the Cichlid Visual Palette through Ontogenetic Subfunctionalization of the Opsin Gene Arrays', *Mol Biol Evol*, **23**, 1538-47.
- Stenkamp, D. L., Hisatomi, O., Barthel, L. K., Tokunaga, F., and Raymond, P. A. 1996. 'Temporal expression of rod and cone opsins in embryonic goldfish retina predicts the spatial organization of the cone mosaic', *Invest Ophthalmol Vis Sci*, **37**, 363-76.
- Stieb, S. M., Carleton, K. L., Cortesi, F., Marshall, N. J., and Salzburger, W. 2016. 'Depth-dependent plasticity in opsin gene expression varies between damselfish (Pomacentridae) species', *Mol Ecol*, **25**, 3645-61.
- Takechi, M., and Kawamura, S. 2005. 'Temporal and spatial changes in the expression pattern of multiple red and green subtype opsin genes during zebrafish development', *J Exp Biol*, **208**, 1337-45.
- Tettamanti, V., de Busserolles, F., Lecchini, D., Marshall, J., and Cortesi, F. 2019. 'Visual system development of the spotted unicornfish, *Naso brevirostris* (Acanthuridae)', *Journal of Experimental Biology*, **222**, 691774.



- The UniProt Consortium.** 2018. 'UniProt: a worldwide hub of protein knowledge', *Nucleic Acids Research*, **47**, D506-D15.
- Toller, W.** 1996. 'Rhodopsin Evolution in the Holocentridae (Pisces: Beryciformes)', Doctoral Dissertation, University of Southern California.
- Tyler, J. C., Johnson, D. G., Brothers, E. B., Tyler, D. M., and Smith, L. C.** 1993. 'Comparative Early Life Histories of Western Atlantic Squirrelfishes (Holocentridae): Age and Settlement of Rhynchichthys, Meeki, and Juvenile Stages', *Bulletin of Marine Science*, **53**, 1126-50.
- Valen, R., Eilertsen, M., Edvardsen, R. B., Furmanek, T., Ronnestad, I., van der Meeren, T., Karlsen, O., Nilsen, T. O., and Helvik, J. V.** 2016. 'The two-step development of a duplex retina involves distinct events of cone and rod neurogenesis and differentiation', *Dev Biol*, **416**, 389-401.
- Valero, K. C. W., Garcia-Porta, J., Rodríguez, A., Arias, M., Shah, A., Randrianiana, R. D., Brown, J. L., Glaw, F., Amat, F., and Künzel, S.** 2017. 'Transcriptomic and macroevolutionary evidence for phenotypic uncoupling between frog life history phases', *Nature Communications*, **8**, 1-9.
- Volkov, L. I., Kim-Han, J. S., Saunders, L. M., Poria, D., Hughes, A. E. O., Kefalov, V. J., Parichy, D. M., and Corbo, J. C.** 2020. 'Thyroid hormone receptors mediate two distinct mechanisms of long-wavelength vision', *Proceedings of the National Academy of Sciences*, **117**, 15262-69.
- Wang, Y., Zhou, L., Wu, L., Song, C., Ma, X., Xu, S., Du, T., Li, X., and Li, J.** 2021. 'Evolutionary ecology of the visual opsin gene sequence and its expression in turbot (*Scophthalmus maximus*)', *BMC Ecology and Evolution*, **21**, 114.
- Xie, S., Han, S., Qu, Z., Liu, F., Li, J., Yu, S., Reilly, J., Tu, J., Liu, X., Lu, Z., Hu, X., Yimer, T. A., Qin, Y., Huang, Y., Lv, Y., Jiang, T., Shu, X., Tang, Z., Jia, H., Wong, F., and Liu, M.** 2019. 'Knockout of Nr2e3 prevents rod photoreceptor differentiation and leads to selective L-/M-cone photoreceptor degeneration in zebrafish', *Biochim Biophys Acta Mol Basis Dis*, **1865**, 1273-83.
- Yokoyama, S., and Takenaka, N.** 2004. 'The molecular basis of adaptive evolution of squirrelfish rhodopsins', *Mol Biol Evol*, **21**, 2071-8.
- Yourick, M. R., Sandkam, B. A., Gammerdinger, W. J., Escobar-Camacho, D., Nandamuri, S. P., Clark, F. E., Joyce, B., Conte, M. A., Kocher, T. D., and Carleton, K. L.** 2019. 'Diurnal variation in opsin expression and common housekeeping genes necessitates comprehensive normalization methods for quantitative real-time PCR analyses', *Molecular Ecology Resources*, **19**, 1447-60.

## Figures and Tables

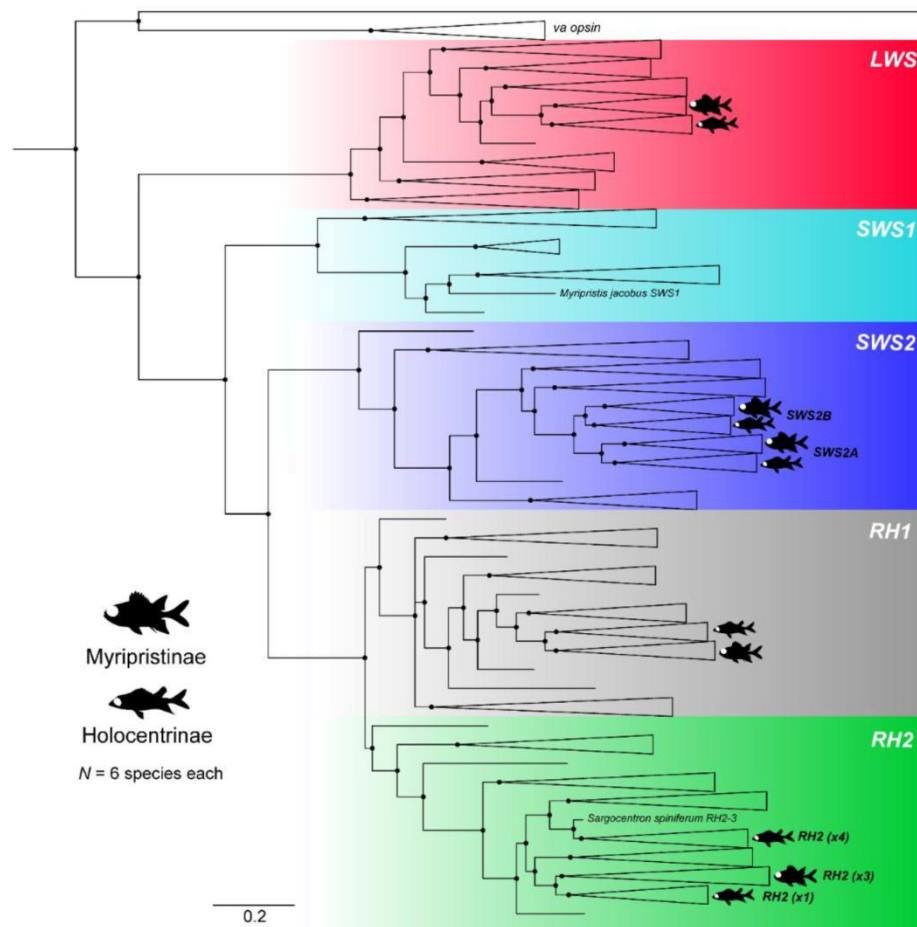

**Fig. 1. Vertebrate opsin gene phylogeny.** Phylogeny including opsin genes from six species per subfamily in Holocentridae denoted as per legend. All expressed genes fell into four out of the five main classes (Bowmaker 2008), while the only *sws1* sequence was derived from a genome (Musilova *et al.* 2019). Numbers in brackets are number of *rh2* paralogs. Black circles denote Bayesian posterior probabilities > 0.8. The scalebar denotes substitutions per site. *rh1*, rhodopsin-like middle-wavelength sensitive 1 (rod opsin); *rh2*, rhodopsin-like middle-wavelength sensitive 2; *sws1*, short-wavelength-sensitive 1; *sws2*, short-wavelength-sensitive 2; *lws*, long-wavelength-sensitive; *va opsin*, vertebrate ancient opsin (outgroup). Genbank accession numbers are provided in Table S2.

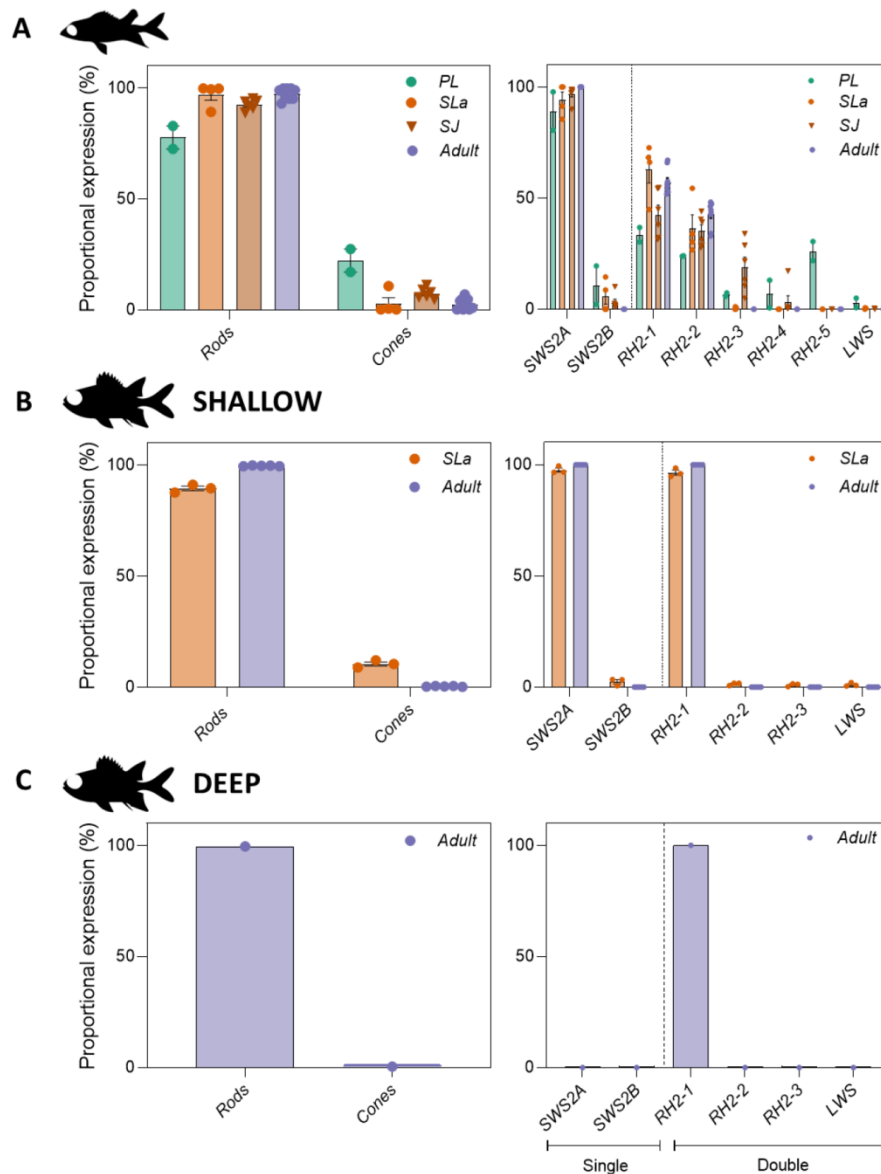

**Fig. 2. Opsin gene expression in holocentrids over ontogeny.** Proportional rod opsin gene expression (given as % of total opsin gene expression) and proportional cone opsin gene expression [given as % of single (*sws*'s) or double (*rh2*s and *lws*) cone opsin gene expression] in (A) Holocentrinae [pre-settlement larvae ( $n=2$ ), settlement larvae ( $n=4$ ), settled juveniles ( $n=6$ ) and adults ( $n=9$ ) from *Sargocentron rubrum*, *S. punctatissimum*, *S. cornutum*, *Neoniphon sammara*], (B) shallow-dwelling Myripristinae [settlement larvae ( $n=3$ ) and adults ( $n=5$ ) from *Myripristis berndti*, *M. kuntzei*, and *M. pralinia*], and (C) deep-dwelling Myripristinae [adults ( $n=1$ ) from *Ostichthys* sp.]. Data are mean  $\pm$  s.e.m. Green, pre-settlement larvae (PL); light orange, settlement-stage larvae (SLa); dark orange, settled juveniles (SJ); purple, adults. *rh1*, rhodopsin-like middle-wavelength sensitive 1 (rod opsin); *rh2*, rhodopsin-like middle-wavelength sensitive 2; *sws2*, short-wavelength-sensitive 2; *lws*, long-wavelength-sensitive.



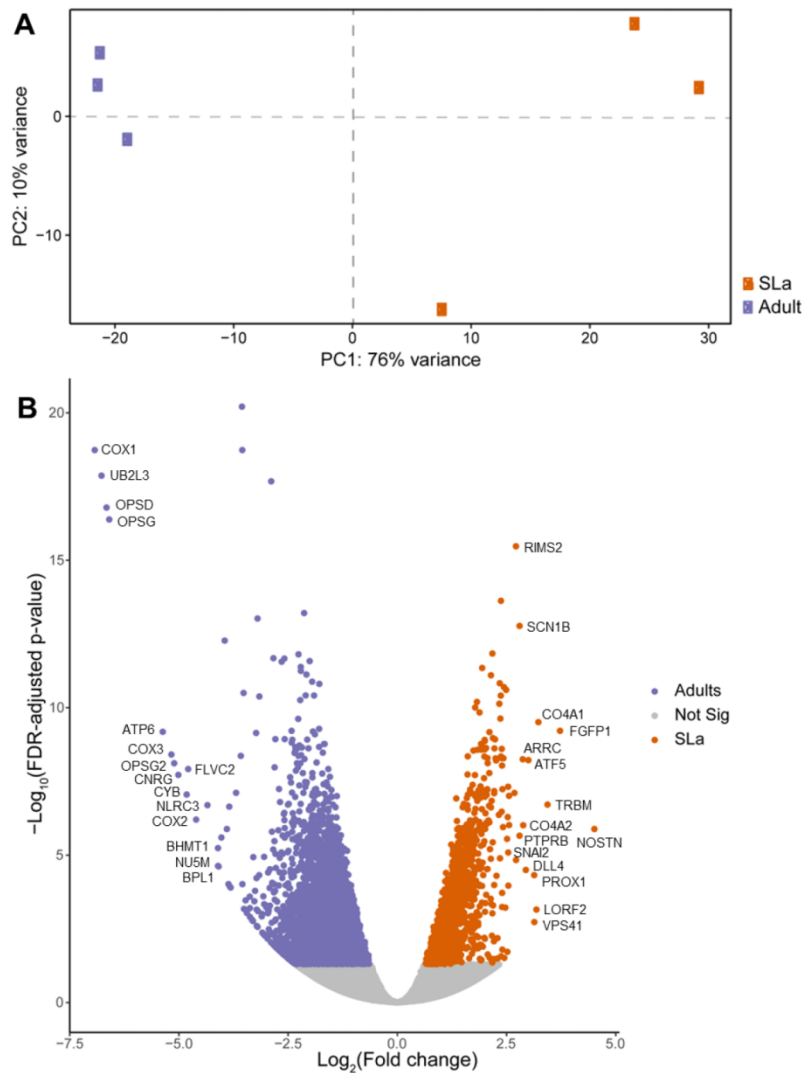

**Fig. 3. Differential gene expression in *Sargocentron punctatissimum* over ontogeny.** (A-B) Differential retinal gene expression between settlement larvae (SLa;  $n=3$ ) and adult ( $n=3$ ) *S. punctatissimum* (Holocentrinae). (A) PCA plot of rlog transformed gene counts showing the variance between individual transcriptomes used for differential gene expression analyses. (B) Volcano plot depicting ( $\log_2$ ) fold changes in expression of all retinal genes against the ( $-\log_{10}$  of the) adjusted p-value. The top 15 upregulated genes (*i.e.*, greatest fold change) at each life stage are labelled. Orange dots with a log fold change  $> 0$  represent transcripts that were significantly higher expressed in settlement larvae, and purple dots with a log fold change  $< 0$  were significantly higher expressed in adults. Grey dots (Not Sig) represent transcripts that were not differentially expressed.

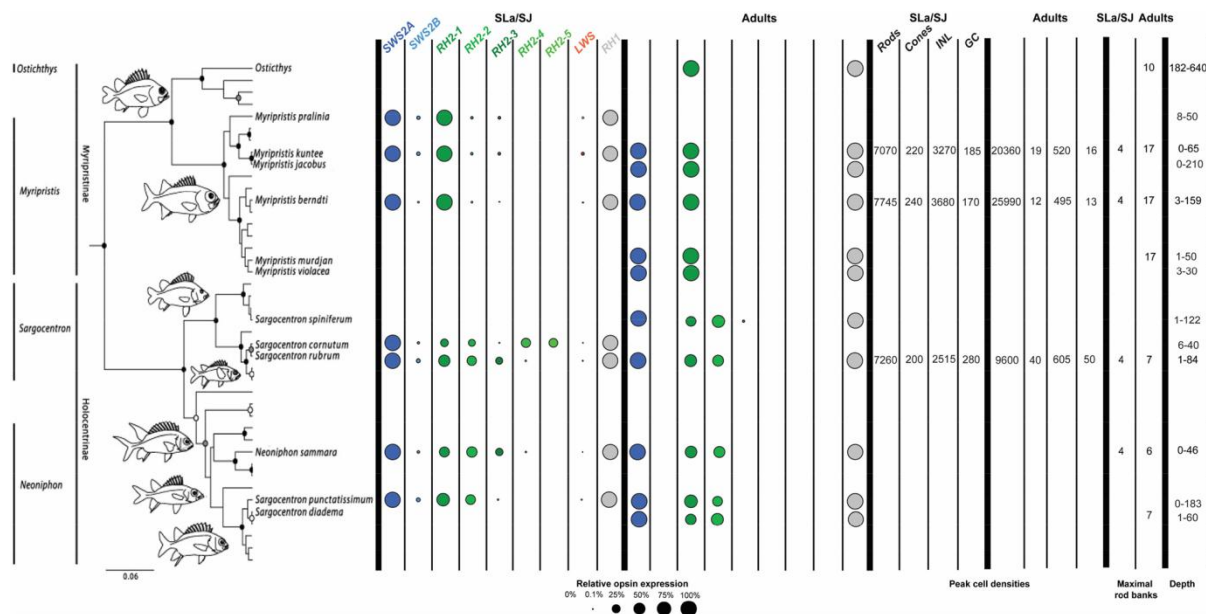

**Fig. 4. Summary of visual adaptations in holocentrids over development.** Opsin gene expression, peak retinal cell densities and maximal rod banking in settlement larvae (SLa) or settled juveniles (SJ) and adults (A) alongside depth at maturity (in metres) are overlaid onto the holocentrid phylogeny. Dots represent the expression of opsin genes in the transcriptome with the size of the dot illustrating relative opsin gene expression as a percentage of total (*rh1*), single cone (*sws2a* and *sws2b*) or double cone (*rh2* and *lws*) opsin gene expression. Peak cell densities (given as cells per 0.01 mm<sup>2</sup> of retina) and maximal rod banking are the highest densities of each respective cell type and the highest number of banks, respectively, found at the given stage after examining the dorsal, ventral, central, nasal, and temporal retina. Phylogeny adapted from Dornburg *et al.* (2012). Note that *Ostichthys* specimen could not be identified to a species level and so the depth for *Ostichthys kaianus* is shown. The maximal rod banking given for the *Ostichthys* species is an estimation since only ventral sections were available. References for depth: *O. kaianus* (Greenfield *et al.* 2017), *M. pralinia* (Allen and Steene 1988), *M. jacobus* (Moore 2015), *M. murdjan* (Lieske 1994), *M. violacea* (Allen and Erdmann 2012), *M. kuntee* (Bacchet *et al.* 2016), *M. berndti* (Allen and Erdmann 2012), *S. spiniferum* (Lieske 1994), *S. cornutum* (Allen and Erdmann 2012), *S. punctatissimum* (Lieske 1994), *S. diadema* (Randall 1998), *S. rubrum* (Randall 1998) and *N. sammara* (Lieske 1994). *rh1*, rhodopsin-like middle-wavelength sensitive 1 (rod opsin); *rh2*, rhodopsin-like middle-wavelength sensitive 2; *sws2*, short-wavelength-sensitive 2; *lws*, long-wavelength-sensitive. Morphological data from: (Fogg *et al.* 2022).

**Table 1. Opsin gene expression in holocentrids over ontogeny.** Proportional opsin gene expression in Holocentrinae and Myripristinae (see legend of Fig. 2 for details of species and number of individuals). Values are mean  $\pm$  s.e.m. given as percentage of total opsin gene expression (*rh1*), single cone opsin gene expression (*sws2a*, *sws2b*) or double cone opsin gene expression (*rh2*, *lws*). *rh1*, rhodopsin-like middle-wavelength sensitive 1 (rod opsin); *rh2*, rhodopsin-like middle-wavelength sensitive 2; *sws2*, short-wavelength-sensitive 2; *lws*, long-wavelength-sensitive.

| Gene         | Pre-settlement larvae – Holocentrinae |        | Settlement larvae - Holocentrinae |        | Settled juveniles – Holocentrinae |        | Adults – Holocentrinae |        |
|--------------|---------------------------------------|--------|-----------------------------------|--------|-----------------------------------|--------|------------------------|--------|
|              | Mean                                  | s.e.m. | Mean                              | s.e.m. | Mean                              | s.e.m. | Mean                   | s.e.m. |
| <i>rh1</i>   | 77.77                                 | 5.18   | 97.03                             | 2.6    | 92.5                              | 0.99   | 97.39                  | 0.86   |
| <i>sws2a</i> | 89.13                                 | 8.63   | 94.21                             | 3.55   | 96.9                              | 1.42   | 100                    | 0      |
| <i>sws2b</i> | 10.87                                 | 8.63   | 5.79                              | 3.55   | 3.1                               | 1.42   | 0                      | 0      |
| <i>rh2-1</i> | 33.56                                 | 3.29   | 62.98                             | 6.18   | 42.55                             | 4.27   | 57.02                  | 1.89   |
| <i>rh2-2</i> | 23.99                                 | 0.08   | 36.3                              | 6.2    | 35.17                             | 2.83   | 42.98                  | 1.89   |
| <i>rh2-3</i> | 6.59                                  | 0.77   | 0.46                              | 0.28   | 18.81                             | 4.59   | 0                      | 0      |
| <i>rh2-4</i> | 6.83                                  | 6.28   | 0                                 | 0      | 3.29                              | 2.78   | 0                      | 0      |
| <i>rh2-5</i> | 26.18                                 | 4.32   | 0                                 | 0      | 0.03                              | 0.03   | 0                      | 0      |
| <i>lws</i>   | 2.85                                  | 2.19   | 0.26                              | 0.15   | 0.15                              | 0.06   | 0                      | 0      |
|              |                                       |        | Settlement larvae – Myripristinae |        |                                   |        | Adults – Myripristinae |        |
|              |                                       |        | Mean                              | s.e.m. |                                   |        | Mean                   | s.e.m. |
| <i>rh1</i>   |                                       |        | 89.42                             | 1.01   |                                   |        | 99.57                  | 0.07   |
| <i>sws2a</i> |                                       |        | 97.57                             | 0.92   |                                   |        | 100                    | 0      |
| <i>sws2b</i> |                                       |        | 2.43                              | 0.92   |                                   |        | 0                      | 0      |
| <i>rh2-1</i> |                                       |        | 96.38                             | 1.13   |                                   |        | 100                    | 0      |
| <i>rh2-2</i> |                                       |        | 1.44                              | 0.36   |                                   |        | 0                      | 0      |
| <i>rh2-3</i> |                                       |        | 1.02                              | 0.38   |                                   |        | 0                      | 0      |
| <i>lws</i>   |                                       |        | 1.13                              | 0.49   |                                   |        | 0                      | 0      |

**Table 2. Function of top upregulated genes in *Sargocentron punctatissimum* over ontogeny.** Tabular summary of annotations for the top 15 upregulated genes (*i.e.*, greatest fold change) at settlement larval and adult stages, along with (non-exhaustive) gene function descriptions.

| Settlement larvae                     |              |                                                                                   |
|---------------------------------------|--------------|-----------------------------------------------------------------------------------|
| Function                              | Gene ID      | Gene name                                                                         |
| Cell differentiation/proliferation    | <i>prox1</i> | Prospero homeobox protein 1                                                       |
|                                       | <i>dll4</i>  | Delta-like protein 4                                                              |
|                                       | <i>fgfp1</i> | Fibroblast growth factor-binding protein 1                                        |
|                                       | <i>atf5</i>  | Cyclic AMP-dependent transcription factor ATF-5                                   |
|                                       | <i>rims2</i> | Regulating synaptic membrane exocytosis protein 2                                 |
|                                       | <i>snai2</i> | Zinc finger protein SNAI2                                                         |
| Basement membrane structure           | <i>co4a1</i> | Collagen alpha-1(IV) chain                                                        |
|                                       | <i>co4a2</i> | Collagen alpha-2(IV) chain (Fragment)                                             |
| Lysosome trafficking                  | <i>vps41</i> | Vacuolar protein sorting-associated protein 41 homolog                            |
| Cone-specific phototransduction       | <i>arrc</i>  | Arrestin-C                                                                        |
| Transposition                         | <i>lorf2</i> | LINE-1 retrotransposable element ORF2 protein                                     |
| Angiogenesis                          | <i>trbm</i>  | Thrombomodulin                                                                    |
|                                       | <i>nostn</i> | Nostrin                                                                           |
|                                       | <i>ptprb</i> | Receptor-type tyrosine-protein phosphatase beta                                   |
| Axon guidance/membrane depolarisation | <i>scn1b</i> | Sodium channel subunit beta-1                                                     |
| Adults                                |              |                                                                                   |
| Function                              | Gene ID      | Gene name                                                                         |
| Visual perception                     | <i>opsd</i>  | Rhodopsin                                                                         |
|                                       | <i>opsg</i>  | Green-sensitive opsin                                                             |
|                                       | <i>opsg2</i> | Green-sensitive opsin-2                                                           |
|                                       | <i>cnrg</i>  | Retinal rod rhodopsin-sensitive cGMP 3',5'-cyclic phosphodiesterase subunit gamma |
| Aerobic respiration                   | <i>cox1</i>  | Cytochrome c oxidase subunit 1                                                    |
|                                       | <i>cox2</i>  | Cytochrome c oxidase subunit 2                                                    |
|                                       | <i>cox3</i>  | Cytochrome c oxidase subunit 3                                                    |
|                                       | <i>cyb</i>   | Cytochrome b                                                                      |
|                                       | <i>atp6</i>  | ATP synthase subunit a                                                            |
|                                       | <i>flvc2</i> | Feline leukemia virus subgroup C receptor-related protein 2                       |
| Protein ubiquitination                | <i>nu5m</i>  | NADH-ubiquinone oxidoreductase chain 5                                            |
|                                       | <i>ub2l3</i> | Ubiquitin-conjugating enzyme E2 L3                                                |
| Protein methylation                   | <i>nlrc3</i> | Protein NLRC3                                                                     |
|                                       | <i>bhmt1</i> | Betaine-homocysteine S-methyltransferase 1                                        |
| Protein biotinylation                 | <i>bpl1</i>  | Biotin-protein ligase                                                             |

**Table S1. Details of animals used in study.** This study used a total of 35 retinal transcriptomes, each from an individual animal, 22 of which were collected in the current study, 13 of which were collected by Musilova *et al.* (2019) or de Busserolles *et al.* (2021). This study also used one genome from Malmstrøm *et al.* (2017). Locations: LI, Lizard Island; MI, Moorea Island; CM, Cairns Marine; CV, Cape Verde. Analyses: RNA-seq, retinal transcriptome sequenced and opsin gene expression evaluated; DGE, differential gene expression analyses encompassing entire retinal transcriptome; Genome, whole genome sequenced and opsin gene sequences extracted. If standard length or eye used was not recorded for an individual, this is marked as n.a. Sequence read archive (SRA) accession numbers are given for individual transcriptomes.

| Species                    | Life stage           | SL (cm) | Location | Eye used | Analyses performed | SRA Accession number | Reference                                                        |
|----------------------------|----------------------|---------|----------|----------|--------------------|----------------------|------------------------------------------------------------------|
| <i>Sargocentron rubrum</i> | Pre-settlement larva | 3.1     | LI       | L        | RNA-seq            | SRR19793295          | This study                                                       |
|                            | Pre-settlement larva | 2.8     | LI       | L        | RNA-seq            | SRR19793294          | This study                                                       |
|                            | Settled juvenile     | 3.0     | LI       | R+L      | RNA-seq            | SRR19793283          | This study                                                       |
|                            | Settled juvenile     | 3.1     | LI       | R+L      | RNA-seq            | SRR19793280          | This study                                                       |
|                            | Settled juvenile     | 3.2     | LI       | R+L      | RNA-seq            | SRR19793279          | This study                                                       |
|                            | Adult                | 14.7    | CM       | L        | RNA-seq            | SRR19793278          | This study                                                       |
|                            | Adult                | 13.4    | CM       | R        | RNA-seq            | SRR19793277          | This study                                                       |
|                            | Adult                | 14.0    | LI       | L        | RNA-seq            | SRX9440505           | (de Busserolles <i>et al.</i> 2021)                              |
| <i>Neoniphon sammara</i>   | Settled juvenile     | n.a.    | LI       | R+L      | RNA-seq            | SRR19793276          | This study                                                       |
|                            | Settled juvenile     | 3.8     | LI       | R+L      | RNA-seq            | SRR19793275          | This study                                                       |
|                            | Adult                | 11.9    | LI       | R        | RNA-seq            | SRX5060694           | (Musilova <i>et al.</i> 2019; de Busserolles <i>et al.</i> 2021) |
|                            | Adult                | 11.8    | LI       | R        | RNA-seq            | SRX5060695           | (Musilova <i>et al.</i> 2019; de Busserolles <i>et al.</i> 2021) |
|                            | Adult                | 9.2     | LI       | R        | RNA-seq            | SRX5060692           | (Musilova <i>et al.</i> 2019; de Busserolles <i>et al.</i> 2021) |
| <i>Myripristis kuntze</i>  | Settlement larva     | 5.7     | MI       | L        | RNA-seq            | SRR19793274          | This study                                                       |
|                            | Adult                | 13      | MI       | R        | RNA-seq            | SRR19793293          | This study                                                       |
| <i>Myripristis berndti</i> | Settlement larva     | 4.9     | MI       | R        | RNA-seq            | SRR19793292          | This study                                                       |
|                            | Adult                | 17.7    | LI       | R        | RNA-seq            | SRX5060705           | (Musilova <i>et al.</i> 2019; de Busserolles <i>et al.</i> 2021) |
|                            | Adult                | 20.0    | LI       | L        | RNA-seq            | SRX5060696           | (Musilova <i>et al.</i> 2019; de Busserolles <i>et al.</i> 2021) |

|                                    |                  |      |      |      |              |             |                                                                  |
|------------------------------------|------------------|------|------|------|--------------|-------------|------------------------------------------------------------------|
|                                    | Adult            | 15.3 | LI   | L    | RNA-seq      | SRX5060738  | (Musilova <i>et al.</i> 2019; de Busserolles <i>et al.</i> 2021) |
|                                    | Adult            | 18.2 | LI   | L    | RNA-seq      | SRX5060727  | (Musilova <i>et al.</i> 2019; de Busserolles <i>et al.</i> 2021) |
| <i>Ostichthys</i> sp.              | Adult            | 20.5 | MI   | R    | RNA-seq      | SRR19793291 | This study                                                       |
| <i>Sargocentron punctatissimum</i> | Settlement larva | 5.2  | MI   | R    | RNA-seq, DGE | SRR19793290 | This study                                                       |
|                                    | Settlement larva | 6.2  | MI   | R    | RNA-seq, DGE | SRR19793289 | This study                                                       |
|                                    | Settlement larva | 5.5  | MI   | L    | RNA-seq, DGE | SRR19793288 | This study                                                       |
|                                    | Settlement larva | 5.4  | MI   | R    | RNA-seq, DGE | SRR19793287 | This study                                                       |
|                                    | Adult            | n.a. | MI   | n.a. | RNA-seq, DGE | SRR19793286 | This study                                                       |
|                                    | Adult            | n.a. | MI   | n.a. | RNA-seq, DGE | SRR19793285 | This study                                                       |
|                                    | Adult            | n.a. | MI   | n.a. | RNA-seq, DGE | SRR19793284 | This study                                                       |
| <i>Sargocentron cornutum</i>       | Settled juvenile | 2.5  | LI   | R+L  | RNA-seq      | SRR19793282 | This study                                                       |
| <i>Myripristis pralinia</i>        | Settlement larva | 4.9  | MI   | R    | RNA-seq      | SRR19793281 | This study                                                       |
| <i>Sargocentron diadema</i>        | Adult            | 10.8 | LI   | R    | RNA-seq      | SRX9440506  | (de Busserolles <i>et al.</i> 2021)                              |
| <i>Sargocentron spiniferum</i>     | Adult            | 20.4 | LI   | R    | RNA-seq      | SRX9440504  | (de Busserolles <i>et al.</i> 2021)                              |
| <i>Myripristis murdjan</i>         | Adult            | 14.8 | LI   | L    | RNA-seq      | SRX9440507  | (de Busserolles <i>et al.</i> 2021)                              |
| <i>Myripristis jacobus</i>         | Adult            | n.a. | CV   | n.a. | RNA-seq      | SRS4076665  | (Musilova <i>et al.</i> 2019; de Busserolles <i>et al.</i> 2021) |
|                                    | Adult            | n.a. | CV   | n.a. | RNA-seq      | SRS4076643  | (Musilova <i>et al.</i> 2019; de Busserolles <i>et al.</i> 2021) |
|                                    | Adult            | n.a. | n.a. | n.a. | WGS          | ERX1545041  | (Malmström <i>et al.</i> 2017; Musilova <i>et al.</i> 2019)      |

**Table S2. Genbank accession numbers.** Accession numbers for opsin gene coding sequences extracted in this study. All extracted opsin gene sequences were full coding sequences (cds), except those labelled as partial cds.

| Species                            | Opsin               | Accession number |
|------------------------------------|---------------------|------------------|
| <i>Myripristis berndti</i>         | RH2-2 (partial cds) | ON817105         |
|                                    | RH2-3 (partial cds) | ON817106         |
| <i>Myripristis kuntee</i>          | RH2-1               | ON817107         |
|                                    | RH2-2 (partial cds) | ON817108         |
|                                    | RH2-3               | ON817109         |
|                                    | RH1                 | ON817127         |
|                                    | SWS2A               | ON817132         |
| <i>Myripristis pralinia</i>        | RH2-1               | ON817110         |
|                                    | RH2-2               | ON817111         |
|                                    | RH2-3               | ON817112         |
|                                    | RH1                 | ON817128         |
|                                    | SWS2A               | ON817133         |
|                                    | SWS2B               | ON817141         |
|                                    | LWS                 | ON817136         |
| <i>Neoniphon sammara</i>           | RH2-3               | ON817113         |
|                                    | RH2-4               | ON817114         |
|                                    | SWS2B               | ON817142         |
|                                    | LWS (partial cds)   | ON817137         |
| <i>Ostichthys</i> sp.              | RH2B                | ON817115         |
|                                    | RH1                 | ON817129         |
| <i>Sargocentron cornutum</i>       | RH2-1               | ON817116         |
|                                    | RH2-2               | ON817117         |
|                                    | RH2-3               | ON817118         |
|                                    | RH2-4               | ON817119         |
|                                    | RH2-5               | ON817120         |
|                                    | RH1                 | ON817130         |
|                                    | SWS2A               | ON817134         |
|                                    | SWS2B               | ON817143         |
| <i>Sargocentron rubrum</i>         | LWS                 | ON817138         |
|                                    | RH2-3               | ON817121         |
|                                    | RH2-4               | ON817122         |
|                                    | RH2-5               | ON817123         |
|                                    | SWS2B               | ON817144         |
| <i>Sargocentron punctatissimum</i> | LWS                 | ON817139         |
|                                    | RH2-1               | ON817124         |
|                                    | RH2-2               | ON817125         |
|                                    | RH2-3               | ON817126         |
|                                    | RH1                 | ON817131         |
|                                    | SWS2A               | ON817135         |
|                                    | LWS (partial cds)   | ON817140         |
|                                    | SWS2B (partial cds) | ON817145         |



**Table S3. Gene ontology terms overrepresented in the holocentrid retina at settlement.** Tabular summary of significantly overrepresented gene ontology terms related to biological processes generated by PANTHER that matched to genes that are differentially expressed in the retina over development in *Sargocentron punctatissimum*. GO terms are given in descending order by fold enrichment. Data derived using *Oryzias latipes* as reference and filtered for terms with FDR-adjusted p-value <0.05 and fold enrichment  $\geq 6$ . FDR, false discovery rate.

| Overrepresented<br>GO biological<br>process (GO ID)                | <i>O. latipes</i> -<br>Reference | <i>S. punctatissimum</i> |                     | +/- | Fold<br>enrichment | Raw p-<br>value | FDR-<br>adjusted<br>p-value |
|--------------------------------------------------------------------|----------------------------------|--------------------------|---------------------|-----|--------------------|-----------------|-----------------------------|
|                                                                    | Frequency                        | Frequency                | Expected<br>p-value |     |                    |                 |                             |
| cell morphogenesis involved in differentiation (GO:0000904)        | 387                              | 7                        | 0.61                | +   | 11.54              | 2.26E-06        | 1.94E-02                    |
| cell morphogenesis involved in neuron differentiation (GO:0048667) | 338                              | 6                        | 0.53                | +   | 11.33              | 1.44E-05        | 4.12E-02                    |
| cell morphogenesis (GO:0000902)                                    | 462                              | 7                        | 0.72                | +   | 9.67               | 7.09E-06        | 3.04E-02                    |
| generation of neurons (GO:0048699)                                 | 731                              | 8                        | 1.15                | +   | 6.98               | 1.51E-05        | 3.24E-02                    |
| neurogenesis (GO:0022008)                                          | 794                              | 8                        | 1.24                | +   | 6.43               | 2.72E-05        | 3.89E-02                    |

**Table S4. Gene ontology terms overrepresented in the holocentrid retina in adults.** Tabular summary of significantly overrepresented gene ontology terms related to biological processes generated by PANTHER that matched to genes that are differentially expressed in the retina over development in *Sargocentron punctatissimum*. GO terms are given in descending order by fold enrichment. Data derived using *Oryzias latipes* as reference and filtered for terms with FDR-adjusted p-value <0.05 and fold enrichment  $\geq 6$ . FDR, false discovery rate.

| Overrepresented GO biological process (GO ID)                                                   | <i>O. latipes</i> - Reference | <i>S. punctatissimum</i> |                  | +/- | Fold enrichment | Raw p-value | FDR-adjusted p-value |
|-------------------------------------------------------------------------------------------------|-------------------------------|--------------------------|------------------|-----|-----------------|-------------|----------------------|
|                                                                                                 | Frequency                     | Frequency                | Expected p-value |     |                 |             |                      |
| positive regulation of double-strand break repair via homologous recombination (GO:1905168)     | 1                             | 2                        | 0.01             | +   | > 100           | 3.57E-04    | 3.90E-02             |
| positive regulation of double-strand break repair (GO:2000781)                                  | 3                             | 3                        | 0.03             | +   | 90.13           | 2.55E-05    | 5.49E-03             |
| electron transport coupled proton transport (GO:0015990)                                        | 4                             | 3                        | 0.04             | +   | 67.6            | 4.43E-05    | 7.78E-03             |
| energy coupled proton transmembrane transport, against electrochemical gradient (GO:0015988)    | 4                             | 3                        | 0.04             | +   | 67.6            | 4.43E-05    | 7.63E-03             |
| negative regulation of intrinsic apoptotic signaling pathway by p53 class mediator (GO:1902254) | 5                             | 3                        | 0.06             | +   | 54.08           | 7.02E-05    | 1.16E-02             |
| regulation of intrinsic apoptotic signaling pathway by p53 class mediator (GO:1902253)          | 6                             | 3                        | 0.07             | +   | 45.07           | 1.04E-04    | 1.55E-02             |
| negative regulation of signal transduction by p53 class mediator (GO:1901797)                   | 8                             | 3                        | 0.09             | +   | 33.8            | 2.02E-04    | 2.68E-02             |
| mitochondrial electron transport, NADH to ubiquinone (GO:0006120)                               | 17                            | 5                        | 0.19             | +   | 26.51           | 3.46E-06    | 1.03E-03             |
| mitochondrial respiratory chain                                                                 | 19                            | 4                        | 0.21             | +   | 18.98           | 1.06E-04    | 1.55E-02             |

|                                                                                 |     |    |      |   |       |          |          |
|---------------------------------------------------------------------------------|-----|----|------|---|-------|----------|----------|
| complex I<br>assembly<br>(GO:0032981)                                           |     |    |      |   |       |          |          |
| NADH<br>dehydrogenase<br>complex assembly<br>(GO:0010257)                       | 19  | 4  | 0.21 | + | 18.98 | 1.06E-04 | 1.53E-02 |
| ATP synthesis<br>coupled electron<br>transport<br>(GO:0042773)                  | 58  | 9  | 0.64 | + | 13.99 | 4.93E-08 | 3.27E-05 |
| aerobic electron<br>transport chain<br>(GO:0019646)                             | 52  | 8  | 0.58 | + | 13.87 | 2.95E-07 | 1.16E-04 |
| mitochondrial<br>ATP synthesis<br>coupled electron<br>transport<br>(GO:0042775) | 53  | 8  | 0.59 | + | 13.61 | 3.37E-07 | 1.26E-04 |
| enteric nervous<br>system<br>development<br>(GO:0048484)                        | 28  | 4  | 0.31 | + | 12.88 | 4.00E-04 | 4.20E-02 |
| oxidative<br>phosphorylation<br>(GO:0006119)                                    | 64  | 9  | 0.71 | + | 12.68 | 1.06E-07 | 5.36E-05 |
| respiratory<br>electron transport<br>chain<br>(GO:0022904)                      | 71  | 9  | 0.79 | + | 11.43 | 2.36E-07 | 9.70E-05 |
| aerobic respiration<br>(GO:0009060)                                             | 95  | 11 | 1.05 | + | 10.44 | 2.50E-08 | 2.15E-05 |
| nerve development<br>(GO:0021675)                                               | 46  | 5  | 0.51 | + | 9.8   | 2.38E-04 | 3.06E-02 |
| electron transport<br>chain<br>(GO:0022900)                                     | 88  | 9  | 0.98 | + | 9.22  | 1.24E-06 | 4.27E-04 |
| cellular respiration<br>(GO:0045333)                                            | 110 | 11 | 1.22 | + | 9.01  | 9.91E-08 | 5.34E-05 |
| ATP metabolic<br>process<br>(GO:0046034)                                        | 130 | 12 | 1.44 | + | 8.32  | 5.83E-08 | 3.59E-05 |
| energy derivation<br>by oxidation of<br>organic<br>compounds<br>(GO:0015980)    | 140 | 12 | 1.55 | + | 7.73  | 1.24E-07 | 5.92E-05 |

## References

- de Busserolles, F., Cortesi, F., Fogg, L., Stieb, S. M., Luehrmann, M., and Marshall, N. J.** 2021. 'The visual ecology of Holocentridae, a nocturnal coral reef fish family with a deep-sea-like multibank retina', *J Exp Biol*, **224**, jeb233098.
- Malmstrøm, M., Matschiner, M., Tørresen, O. K., Jakobsen, K. S., and Jentoft, S.** 2017. 'Whole genome sequencing data and de novo draft assemblies for 66 teleost species', *Scientific Data*, **4**, 160132.
- Musilova, Z., Cortesi, F., Matschiner, M., Davies, W. I. L., Patel, J. S., Stieb, S. M., de Busserolles, F., Malmstrom, M., Torresen, O. K., Brown, C. J., Mountford, J. K., Hanel, R., Stenkamp, D. L., Jakobsen, K. S., Carleton, K. L., Jentoft, S., Marshall, J., and Salzburger, W.** 2019. 'Vision using multiple distinct rod opsins in deep-sea fishes', *Science*, **364**, 588-92.
